1 Live cell monitoring of double strand breaks in *S. cerevisiae*

2

3 David P. Waterman, Cheng-Sheng Lee, Michael Tsabar, Felix Zhou, Vinay V. Eapen,

4 Allison Mazzella and James E. Haber\*

5

6 Rosenstiel Basic Medical Science Center and the Department of Biology, Brandeis

7 University, Waltham, MA, 02454

8

9 Corresponding author

10 Email: [haber@brandeis.edu](mailto:haber@brandeis.edu)

11

12

13

14

15

16

17

18

19

20

21

22

23

24

25

26

27

28

29

30 **Abstract**

31 We have used two different live-cell fluorescent protein markers to monitor the  
32 formation and localization of double-strand breaks (DSBs) in budding yeast. Using  
33 GFP derivatives of the Rad51 recombination protein or the Ddc2 checkpoint protein,  
34 we find that cells with three site-specific DSBs, on different chromosomes, usually  
35 display 2 or 3 foci that coalesce and dissociate. Rad51-GFP, by itself, is unable to  
36 repair DSBs by homologous recombination in mitotic cells, but is able to form foci  
37 and allow repair when heterozygous with a wild type Rad51 protein. The kinetics of  
38 disappearance of Rad51-GFP foci parallels the completion of DSB repair. However,  
39 in meiosis, Rad51-GFP is proficient when homozygous. Using Ddc2-GFP, we  
40 conclude that co-localization of foci following 3 DSBs does not represent formation  
41 of a homologous recombination “repair center,” as the same distribution of Ddc2-  
42 GFP foci was found in the presence or absence of the Rad52 protein. The  
43 maintenance of separate DSB foci and much of their dynamics depend on functional  
44 microtubules, as addition of nocodazole resulted in a greater population of cells  
45 displaying a single focus.

46

#### 47 **Author Summary**

48 Double strand breaks (DSBs) pose the greatest threat to the fidelity of an organism’s  
49 genome. While much work has been done on the mechanisms of DSB repair, the  
50 arrangement and interaction of multiple DSBs within a single cell remain  
51 unclear. Using two live-cell fluorescent DSB markers, we show that cells with 3 site-  
52 specific DSBs usually form 2 or 3 foci what can coalesce into fewer foci but also  
53 dissociate. The aggregation of DSBs into a single focus does not depend on the  
54 Rad52 recombination protein, suggesting that there is no “repair center” for  
55 homologous recombination. DSB foci are highly dynamic and their dynamic nature  
56 is dependent on microtubules.

57

#### 58 **Introduction**

59 The process of repairing chromosomal double-strand breaks by Rad51- and Rad52-  
60 mediated homologous recombination in budding yeast has been defined by a  
61 combination of in vitro analysis of purified recombination proteins ([1-3](#)) and from

62 “in vivo biochemistry” analyses of the kinetics of repair of site-specific DSBs (4).  
63 Cleaved DNA ends are attacked by several 5’ to 3’ exonucleases to produce long 3’-  
64 ended single-strand DNA (ssDNA) tails, which are initially coated by the single-  
65 strand binding complex, RPA (5, 6). RPA is displaced by Rad51 recombinase  
66 through the action of mediator proteins, including Rad52, creating a nucleoprotein  
67 filament composed primarily of Rad51 but also its paralogs, the Rad55-Rad57  
68 heterodimer (7-9). The Rad51 filament engages in a genome-wide search for a  
69 homologous sequence that could be on a sister chromatid, a homologous  
70 chromosome or at an ectopic location. Once the donor sequence is encountered,  
71 Rad51 catalyzes strand exchange to form a D-loop intermediate, the initial step in  
72 repair. The 3’ end of the invading strand then acts as a primer to initiate new DNA  
73 synthesis that leads to repair of the DSB via several pathways including gene  
74 conversion via synthesis-dependent strand annealing or a double Holliday junction  
75 pathway. A combination of Southern blot, PCR and chromatin immunoprecipitation  
76 (ChIP) experiments have shown that DSB repair proceeds by a series of kinetically  
77 slow steps, taking more than an hour to complete (reviewed in (4)).

78  
79 In haploid cells, successful recombination with an ectopic donor sequence is  
80 strongly dictated by the contact probability of sequences within different  
81 chromosomes (10, 11). When the ends of the DSB fail to encounter a donor, or in  
82 the case where there is no donor, an unrepaired break eventually enters a different  
83 pathway, where it associates with the nuclear envelope through its association with  
84 the nuclear envelope protein Mps3 (12). Localization to the envelope may alter  
85 further end-resection and may facilitate joining of DSB ends by nonhomologous end-  
86 joining (13).

87  
88 One approach to the study of DSB repair in budding yeast has been the use of live-  
89 cell microscopy to monitor the behavior of different fluorescently tagged repair-  
90 associated proteins. The most thoroughly studied is Rad52, the key mediator for the  
91 assembly of the Rad51 filament, but which is also critical in later strand-annealing  
92 steps(14). Strikingly when there are multiple DSBs, created by ionizing radiation or

93 by site-specific endonucleases, there often appears to be a single fluorescent Rad52  
94 focus. This observation has led to the idea that there could be a “repair center”  
95 where recombination proteins might accumulate to facilitate DSB repair (15).  
96 However, immunofluorescent staining of spread nuclei with multiple DSBs found  
97 that the number of foci directly correlated with the number of DSBs (16)  
98  
99 A limitation in extending these studies has been the absence of other live-cell  
100 markers to follow repair. To this end, we constructed and characterized a Rad51-  
101 GFP fusion protein. Previously, a Rad51-GFP fusion was characterized in  
102 *Arabidopsis*, where it proved to be defective in mitotic DSB repair, but competent in  
103 meiosis (17). This phenotype resembles the “site II” mutation of *Saccharomyces*  
104 *cerevisiae* Rad51, which can bind ssDNA but is unable to bind dsDNA and thus fails  
105 to complete strand invasion and DSB repair in mitotic cells (18, 19). Similar results  
106 were obtained using a human isoform of Rad51-GFP *in vitro* (20). In fission yeast,  
107 scRad51’s homolog Rhp51 when fused with CFP proved to be UV sensitive and  
108 incapable of carrying our repair on its own, but this defect was complimented by  
109 expression of wild type Rhp51 (21). Here we show that yeast Rad51-GFP binds to  
110 site-specific DSBs in mitotic cells but cannot catalyze homologous recombination  
111 when it is the only allele present; however, it is not dominant-negative - as is a  
112 similar construct in *Arabidopsis* (17). Consequently, Rad51-GFP can be used to  
113 follow GFP-labeled filaments that are engaged in functional recombination. In  
114 meiosis, budding yeast Rad51 acts as an auxiliary factor with the Rad51 homolog,  
115 Dmc1, and the site II mutant is competent for meiotic recombination (18). As with  
116 the *Arabidopsis* construct, yeast Rad51-GFP is competent for meiosis. Thus, we have  
117 developed a live-cell reporter for Rad51 in response to DSBs in both mitotic and  
118 meiotic cells where recombination can be induced synchronously.  
119  
120 Using either Rad51-GFP or a GFP fusion of the DNA damage checkpoint protein  
121 Ddc2, yeast’s homolog of the ATRIP protein that has been previously shown to bind  
122 near a DSB and to recruit Mec1<sup>ATR</sup> kinase (22, 23), we show that cells which have  
123 multiple site-specific DSBs form multiple, highly dynamic GFP foci that coalesce and

124 separate. In the majority of these cases, there are also multiple Rad52 foci, although  
125 some limitation in Rad52-RFP expression or a propensity for self-aggregation  
126 appears to restrict the number of Rad52-RFP foci even when there are distinct GFP  
127 foci. These results suggest that multiple DSBs do not generally form a Rad52-  
128 dependent repair center.

129

## 130 **Results**

### 131 **Rad51-GFP forms a DNA damage-dependent focus**

132 An ideal tool for monitoring DSB formation and repair would be a fluorescent  
133 protein that performs a central role in homologous recombination. We created a  
134 Rad51-GFP fusion construct utilizing a -SSGSSG- linker, which we have previously  
135 used to increase the functionality of other fusion proteins (24). We integrated this  
136 construct at the C-terminus of the genomic copy of *RAD51* in the donorless,  
137 galactose inducible HO-inducible strain JKM179 in which a single irreparable DSB is  
138 induced upon addition of galactose (25). More than 70% of cells displayed a single  
139 GFP focus within 3 h after inducing HO expression, increasing to >90% by 5 h  
140 (Figure 1D and S1A). Rad51-GFP foci were absent in *rad52* $\Delta$  cells or in cells that  
141 lack an HO cleavage site (Figures 1 and S1). When Rad51-GFP was coexpressed  
142 with Rad52-RFP, green and red foci colocalized (Figure 1F, S1D).

143

144 Rad51 has been shown to increase in abundance after DNA damage (26, 27). Such  
145 an increase is evident comparing the total nuclear intensity of Rad51-GFP in cells  
146 with a DSB (with or without Rad52) compared to cells lacking the HO cleavage site  
147 (Figure 1E).

148

149 To test directly if Rad51-GFP was bound to the DNA around the DSB, we performed  
150 chromatin immunoprecipitation using an antibody recognizing Rad51 to assay  
151 Rad51-GFP accumulation 5 kb from the DSB induced in the *MAT $\alpha$*  locus in a  
152 derivative of strain JKM179, lacking donor sequences, as described previously (28).  
153 As shown in Figure 1G, Rad51-GFP binding 5 kb from the unrepaired DSB end

154 increased steadily over 6 h. Rad51-GFP binding appears similar in its kinetics to  
155 wild type Rad51, as measured previously ([19](#), [28](#)). Therefore, Rad51-GFP effectively  
156 binds to resected DNA around a DSB and thus shows promise for further live cell  
157 studies.

158

159 **Rad51-GFP cannot repair DSBs by homologous recombination in mitotic cells,**  
160 **but it is not dominant negative.**

161 Next, we sought to determine whether Rad51-GFP was functional with regard to the  
162 DNA damage checkpoint and to DSB repair. Cells that suffer an irreparable DSB  
163 arrest for 9-12 h through activation of the DNA damage checkpoint. After about 12  
164 h, and without repairing the DSB, yeast cells switch off the checkpoint and proceed  
165 through mitosis in a process called adaptation ([25](#), [29](#), [30](#)). Adaptation requires  
166 Rad51, but not Rad52; in *rad51* $\Delta$  most cells permanently arrest prior to mitosis after  
167 a DSB ([31](#)). However, Rad51-GFP cells are capable of adapting similar to wild type  
168 (Figure 2A).

169

170 In the assays described thus far, the DSBs were irreparable by HR because of the  
171 lack of a donor template. To investigate the ability of Rad51-GFP to participate in  
172 HR, we turned to strain YJK17, in which there is a DSB at *MAT* $\alpha$  on Chr3 and a single  
173 ectopic *MAT* $\alpha$ -inc donor sequence on Chr5 ([32](#)). An HO break is repaired in roughly  
174 80% of cells over the course of 6-9 h. YJK17 carrying Rad51-GFP failed to repair the  
175 DSB (Fig. 2B). Given the multimeric nature of the Rad51 filament and that many  
176 Rad51 mutations are dominant-negative ([33](#), [34](#)) we asked if Rad51-GFP is  
177 dominant negative. We found that HO-induced DSB repair in YJK17 was repair-  
178 proficient after introducing wild type Rad51 on a centromeric plasmid, expressed  
179 from the its own promoter (Figure 2B). The kinetics of repair, monitored by qPCR,  
180 were very similar for Rad51-GFP complemented by *RAD51* compared to wild type  
181 (Figure 2D). In parallel with repair, the percent of cells displaying a GFP focus  
182 decreased from 80% at 4 h to ~50% by 7 h and fewer than 30% by 9 h, whereas

183 without the complementing Rad51, foci persisted (Figure 2C). This decreased  
184 correlated with the timing of repair as monitored by qPCR (Figure 2C).  
185  
186 Further evidence that Rad51-GFP is not dominant-negative was found by  
187 monitoring cells exposed to 0.002% MMS, which was lethal to Rad51-GFP cells but  
188 not to wild type (Figure 2E). The sensitivity of the Rad51-GFP strain was rescued by  
189 providing wild type *RAD51*, expressed from its own promoter, on a centromere-  
190 containing plasmid. These data suggest that Rad51-GFP is capable of binding DNA  
191 even in the presence of wild type Rad51 and the GFP fusion's loss of function can be  
192 complimented by expression of wild type Rad51.

193

#### 194 **Rad51-GFP is competent in meiosis**

195 *Arabidopsis* Rad51-GFP proved to be meiosis-competent even though it blocked  
196 mitotic recombination (17). As noted above, this phenotype resembles a Rad51 “site  
197 II” mutation in budding yeast (18). In meiosis, the critical functions of strand  
198 exchange depend on Rad51's homolog, Dmc1, with Rad51 acting in an apparently  
199 allosteric fashion. We found that Rad51-GFP is meiosis-proficient. Diploids  
200 homozygous or heterozygous for Rad51-GFP produced the same percentage of as  
201 wild type. (Figure 3A). After tetrad dissection, spores resulting from diploids  
202 homozygous for Rad51-GFP exhibited a 40% reduction in spore viability, but  
203 nevertheless 60% of spores were viable (Figure 3B). Thus, *S. cerevisiae* Rad51-GFP  
204 strongly resembles a site II mutation (18).

205

#### 206 **Multiple DSBs form discrete Rad51-GFP foci**

207 We extended our analysis to monitor the appearance of multiple DSBs, to determine  
208 whether multiple DSBs would appear as a single Rad51-GFP focus or as distinct  
209 Rad51-GFP foci. We inserted Rad51-GFP into strain YCSL004 carrying 3 HO  
210 cleavage sites, each on a different chromosome, as well as Rad52-RFP, and counted  
211 the number of foci 3 h after *GAL::HO* induction. We observed an average of 2 Rad51-  
212 GFP foci (Figures 4A, B, S2A). This distribution was unchanged in *lig4Δ* cells, in  
213 which repair by end-joining is blocked (35-37)(Figure S2B).

214

215 In wild type cells, we noticed several instances of cells displaying a single Rad52-  
216 RFP focus but multiple Rad51-GFP foci (Figures 4Aiii and B). In these cells, the  
217 single Rad52-RFP focus was typically large and always colocalized with a single  
218 Rad51-GFP focus. Therefore, monitoring the number and locations of DSBs via  
219 Rad52 may not serve as a realistic reflection of the actual DSB state.

220

221 We also examined Rad51-GFP foci in strains with 6 HO cleavage sites (38). We  
222 observed a range of the number of foci per cell, averaging 3.2 foci, 6 h after HO  
223 induction (Figures 4C, D, and S2C).

224

### 225 **Live cell detection of DSBs with Ddc2-GFP**

226 In strains with multiple DSBs, only a small proportion display a single Rad51-GFP  
227 focus, raising the question whether DSBs are usually recruited into a repair center.  
228 However, whether the distribution of foci depends on Rad52 is impossible to test  
229 using Rad51-GFP, as Rad51's recruitment is completely dependent on Rad52 (28,  
230 39). To directly ask whether Rad52 recruits multiple DSBs to the same location in  
231 the nucleus, we monitored DSB dynamics using a live cell marker that is  
232 independent of Rad52.

233

234 One such candidate is the DNA damage checkpoint protein Ddc2. Ddc2 localizes to a  
235 broken DNA end, either directly or by binding to RPA (22, 23, 40) and previous  
236 studies have shown strong localization of Ddc2-GFP at DSB sites (41-43). We carried  
237 out an analysis similar to that described above for Rad51-GFP, using a derivative of  
238 strain YSCL004 with 3 HO-induced DSBs but carrying an insertion of GFP at the C-  
239 terminus of the chromosomal copy of Ddc2 (strain VE290). Again, we observed cells  
240 with 1, 2, or 3 foci with an average of 2 foci per cell (Figures 5A, B, and S3A). We  
241 repeated this analysis in a *rad52*Δ derivative and found no difference in the  
242 distribution of Ddc2-GFP foci (Figures 5B and S3B). Hence, Ddc2 foci are not  
243 dependent on Rad52. However, in *rad52*Δ, we noticed a small percentage of cells



244 that had more than 3 foci (Figure 5B, S3B, Movies S1-S3). In 5.4% of *rad52Δ* cells, 4  
245 and sometimes 5 foci were evident (Figure 5B), suggesting that Rad52 might be  
246 partially responsible for holding together the ends of DSBs.

247

248 Even in the absence of Rad52, we observed ~25% of cells displaying a single focus.  
249 It is possible that in single-focus cells, HO had not efficiently cut all three sites. To  
250 address this possibility, we took advantage of the high signal specificity and low  
251 nuclear background signal in cells expressing Ddc2-GFP to determine the  
252 fluorescent signal intensity of individual foci. It is evident that the intensity of the  
253 single focus was much greater than the average intensities of each focus in cells  
254 displaying 2 foci or 3 foci. Indeed, the signal intensity of 1 focus is equal to the sum  
255 of the signal intensities of 3 foci (Figure 5C). Thus, cells with a single focus  
256 apparently have 3 DSBs that are indeed co-localized. These intensities were  
257 unchanged in *rad52Δ* (Figure 5C).

258

### 259 **DSB foci are dynamic**

260 Chromosomal mobility and chromatin persistence length are radically altered after  
261 the induction of a DSB (44-46). We examined the stability of foci with 3 DSBs DSB by  
262 observing cells using over a ten minute period 3 h after HO induction, using  
263 spinning disk confocal microscopy. In 85% of cases, the number and general  
264 localization of foci in a given cell remained constant over 10 min (Movies S7-S10).  
265 However, in 15% of cells, we observed changes in the number of Ddc2-GFP foci. We  
266 found instances when the number of foci diminished, from three to two or from two  
267 to one, as well as a single focus splitting into two or three foci (Figure 5E, Movies  
268 S11 – S17). This behavior was unchanged in *rad52Δ*, with the exception of a few  
269 cells with >3 foci described above. We conclude that DSBs are dynamic and that  
270 Rad52 is not the mediator of a DSB repair center.

271

### 272 **Microtubules control DSB dynamics**

273 Due to the dynamic nature of multiple DSBs, we sought to determine the molecular  
274 mechanism behind this motion. The spindle pole, microtubules, and the kinetochore  
275 have all been implicated in governing chromatin mobility in response to DNA  
276 damage ([47](#), [48](#)). Furthermore, DSBs have been shown to colocalize with spindle  
277 pole bodies preferentially loaded with the SUN protein Mps3 ([12](#), [49](#)). However, in  
278 our 3-DSB system expressing Ddc2-GFP and Mps3-mCherry, we find only 28% of  
279 cells exhibit Ddc2/Mps3 colocalization (Figure 6A). To test whether the action of  
280 microtubules was required for DSB dynamics in our system, we induced HO for 3 h  
281 in cells suffering 3 DSBs and expressing Ddc2-GFP. After 2 h, we added nocodazole  
282 for 1 h then monitored foci dynamics by live cell confocal microscopy (Figure 6B).  
283 The distribution of foci per cell was drastically shifted towards many more single  
284 focus cells (Figure 6C). Thus, DSB dynamics are driven by microtubules and in the  
285 absence of microtubules multiple DSBs colocalize.

286

## 287 **Discussion**

288 DSB repair must be coordinated in space and time in order to faithfully repair  
289 lesions to the genome. The role of many proteins involved in DSB repair has been  
290 elucidated through in vitro and in vivo biochemistry, but the lack of suitable live  
291 cells markers has provided a barrier to studying DSB repair in real-time. Here, we  
292 report DSB dynamics in single- and multiple-break conditions using two different  
293 fluorescently tagged proteins that carry out different functions in response to DNA  
294 damage; the recombinase Rad51-GFP and the checkpoint-related protein Ddc2-GFP.  
295 In both cases, multiple DSBs resulted in multiple fluorescent foci.

296

297 Using Rad51-GFP or Ddc2-GFP in our 3 DSB system, the majority of cells exhibit two  
298 or three foci. Rad51-GFP foci often colocalize with Rad52-RFP, but we see many  
299 instances with more GFP foci than RFP foci. Previous studies have looked  
300 specifically at the role of Rad52 in organizing a “repair center” yeast ([15](#), [50](#)). Our  
301 data suggests that monitoring Rad52 focus formation may underestimate the  
302 number of DSBs throughout the nucleus. This difference may in part reflect the  
303 temporal recruitment of DSB repair proteins to the site of DSBs such that the

304 continued presence of Rad52 at a DSB may not be necessary once a Rad51 filament  
305 has been established.

306

307 While our Rad51-GFP construct is not able, by itself, to repair DSBs by homologous  
308 recombination, it is not dominant negative and supports recombination in meiosis.  
309 Biochemical work on a human isoform of Rad51 fused to GFP determined that the  
310 fluorescent tag prevented Rad51 from engaging in the pairing of homologous  
311 sequences by inhibiting Rad51's secondary DNA binding (20). We envision the  
312 same to be true of our Rad51-GFP construct because our ChIP experiments and  
313 microscopy suggest that Rad51-GFP can efficiently bind to ssDNA and form a  
314 filament, its first step in homologous recombination. However, when Rad51-GFP is  
315 the sole copy of Rad51 in cells, DSB repair by homologous recombination is  
316 incomplete, presumably at the strand exchange step.

317

318 Rad51-GFP's defect in ectopic gene conversion is suppressed by addition of a single  
319 second copy of wild type Rad51 expressed from its endogenous promoter. Likewise,  
320 the MMS sensitivity conferred by Rad51-GFP was also rescued by expression of wild  
321 type Rad51. However, it is not that wild type Rad51 simply excludes Rad51-GFP  
322 from binding ssDNA, since Rad51-GFP readily forms a focus in the presence of wild  
323 type Rad51. This is similar to a similar construct reported in fission yeast (21).

324 Together with previous reports, data suggest either that a functional Rad51 filament  
325 does not require every Rad51 molecule to be functional or that subunit-subunit  
326 interactions between wild type and GFP-tagged Rad51 corrects the defect. The  
327 exact stoichiometry for a functional filament cannot be determined from these  
328 experiments, but from previous work done by our lab (51) we speculate that there  
329 need to be at least two to three functional Rad51 molecules in tandem to facilitate  
330 minimal Rad51-mediated strand exchange.

331

332 To directly test whether Rad52 recruits multiple DSBs into a common locus, we  
333 used Ddc2-GFP, which forms foci independent of Rad52. In our 3-DSB strain, we see  
334 an average of 2 Ddc2-GFP foci per cell, but still about 25% of cells display a single

335 focus, as with Rad51-GFP. However, this distribution remains unchanged in a  
336 *rad52Δ* derivative. Therefore, we conclude that Rad52 is not required for  
337 organizing multiple DSBs into one specific nuclear location. However, Rad52  
338 appears to be partially responsible for tethering the ends of the DSB together, as we  
339 see a small but significant population of cells with greater than 3 Ddc2-GFP foci in  
340 *rad52Δ*. Both the Ku complex and Mre11 have been implicated in DSB end tethering  
341 previously ([52](#), [53](#)), but this study is the first to suggest that Rad52 is also a key  
342 player in end tethering.

343

344 That DSB foci are dynamic also supports our model that DSBs do not generally form  
345 a repair center. Increased chromatin motion in response to a DSB is believed to aid  
346 in DNA repair through facilitating in homology search throughout the genome ([44-](#)  
347 [46](#)) but the precise mechanism for this motion is relatively unclear. A recent study  
348 from the Durocher lab demonstrated that the DNA damage checkpoint kinase  
349 cascade targets the kinetochore-associated protein Cep3 and this phosphorylation  
350 increases chromatin movement through activation of the spindle assembly  
351 checkpoint ([47](#)). Similarly, increased chromatin movement in response to a single  
352 DSB has been shown to be microtubule dependent ([48](#)). In our system, functional  
353 microtubules promote DSB dynamics; in their absence, DSBs tend to coalesce.  
354 However, given that the foci distribution in three HO break cells are not altered in  
355 *rad52Δ*, the exact mechanism behind this coalescence remains to be determined.

356

## 357 **Materials and Methods**

358

### 359 **Strain and Plasmid Construction:**

360 Standard yeast genome manipulation procedures were used for all strain  
361 constructions ([54](#)). Linear DNA and plasmids were introduced by the standard  
362 lithium acetate transformation procedure ([55](#)). To C-terminally tag Rad51 and Ddc2  
363 with GFP, PCR primers were used to amplify the GFP fragment from pFA6a-  
364 GFP(S65T) and the *TRP1* or KAN selectable marker in the Longtine collection ([56](#))

365 and introduced to the appropriate parent strain by lithium acetate transformation.  
366 Strain genotypes are listed in Table S1. Primer sequences are listed in Table S2.

367

### 368 **Growth Conditions:**

369 To visualize the chromosomally integrated fluorescent tags (Rad51-GFP and Ddc2-  
370 GFP) after DNA damage, cells from a single colony were grown overnight in 5ml YEP  
371 + 4% lactic acid (YPLac). Cells were diluted to OD600 = 0.2 and grown for 4 h in 5  
372 ml of fresh YPLac before addition of galactose to a final concentration of 2% to  
373 induce *GAL::HO* expression. For experiments that visualized Rad52-RFP, the same  
374 growth procedure except that cells were grown in SD-leucine media supplemented  
375 with 2% raffinose.

376

### 377 **Plating Assays and Viability**

378 The efficiency of DSB repair by homologous recombination was determined as  
379 described previously for strain YJK17 ([32](#)). Briefly, cells of the appropriate strain  
380 were selected from a single colony on YPD plates and grown overnight in 5 ml of  
381 YPLac. Cells were diluted to OD600 = 0.2 and allowed to grow until OD600 = 0.5 –  
382 1.0. Approximately 100 cells from each culture were then plated on YPGal (2% v/v)  
383 and YPD in triplicate and incubated at 30 °C. Viability was calculated by dividing the  
384 number of colonies on YPGal by the number of colonies on YPD.

385

386 Adaptation assays in strain JKM179 were performed as previously described ([24](#)).  
387 Briefly, cells were grown in YPLac or SD- media supplemented with 2% raffinose  
388 overnight then individual unbudded (G1) cells were plated on YPGal and observed  
389 microscopically for 24 h to determine the percent that were arrested in the G2/M  
390 stage of the cell cycle.

391

392 Viability on MMS media was determined by as described by ([57](#)) . Cells of the  
393 appropriate strain were selected from a single colony on YPD plates and grown  
394 overnight in 5 ml of selective media to near saturation. The following day, cultures  
395 were diluted to OD600 = 0.2 and left to grow at 30 °C for 3-5 doublings. Cells were

396 then diluted in 200  $\mu$ l sterile water to OD600 = 0.2 in a 96-well plate and  
397 subsequently 10-fold serially diluted six times. Cell dilutions were then plated on  
398 YPD, -leu, and -leu +0.002% MMS plates and left to grow at 30 °C for three days.

399

#### 400 **Image Acquisition and Analysis**

401 Prior to imaging, cells were washed twice in imaging media SC supplemented with  
402 2% galactose or 2% raffinose and mounted on a glass depression slide coated with  
403 agarose supplemented with all amino acids. GFP and RFP signals were visualized  
404 with Zeiss AxioObserver spinning disk microscope, 63x objective set to acquire 10 z-  
405 stack images spaced at 0.4  $\mu$ m. Z-stacks were imported into Fiji and max-projected  
406 to acquire a single image sum of all slices. Foci were counted by adjusting the image  
407 color threshold to the average nuclear signal intensity for a given image and  
408 counting spherical regions that gave pixel intensity above the threshold. For GFP  
409 and RFP colocalization analysis, max projected z-stacks were merged in Fiji and  
410 analyzed for overlapping foci. Rad51-GFP nuclear intensities were quantified by  
411 measuring the integrated intensities of concentric nuclear circles from max  
412 projecting z-stack images and subtracting from this value the average background  
413 fluorescent intensities. Ddc2-GFP spot intensities were determined in a similar  
414 fashion.

415

#### 416 **Chromatin Immunoprecipitation**

417 Chromatin immunoprecipitation (ChIP) was carried out as described in (58). In  
418 brief, cells were harvested from log-phase population. 45 ml of culture were fixed  
419 and crosslinked with 1% formaldehyde for 10 minutes after which 2.5 ml of 2.5 M  
420 glycine was added for 5 minutes to quench the reaction. Cells were pelleted and  
421 washed 3 times with 4°C TBS. Cell wall was disrupted by 1 h bead beating in lysis  
422 buffer, after which cells sonicated for 2 minutes. Debris was then pelleted and  
423 discarded, and equal volume of lysate was immunoprecipitated using  $\alpha$ -ScRad51  
424 antibody for 1 hour in 4°C, followed by addition of protein-A agarose beads for 1 h  
425 at 4°C. The immunoprecipitate was then salt washed 5 times, and crosslinking was

426 reversed at 65°C overnight followed by proteinase-K addition for 2 h. Protein and  
427 nucleic acids were separated by phenol extraction. Chromatin association with  
428 Rad51 was assessed by qPCR. More detailed protocols and recipes are available  
429 upon request.  $\alpha$ -ScRad51 antibodies were a generous gift of A. Shinohara  
430 (University of Osaka, Osaka, Japan) and from Douglas Bishop (University of Chicago,  
431 Chicago, IL).

432

### 433 **DSB Repair Analysis by qPCR**

434 Monitoring repair kinetics by qPCR was performed as described previously (59).  
435 Single colonies were inoculated in 5ml of -leu dropout media with 2% dextrose and  
436 grown overnight at 30°C. Overnight cultures were then diluted into 600ml of YPLac  
437 and grown into log phase. DSBs were induced by adding 20% galactose to a final  
438 concentration of 2%. To track the dynamics of DSB repair 50ml aliquots of each  
439 culture was collected every hour over 9 h. DNA was isolated using a MasterPure™  
440 Yeast DNA Purification Kit (Epicentre cat. MPY80200). The repair product *MATa-inc*  
441 was amplified using primers MATp13 and MATYp4 with a SYBR Green Master Mix  
442 using a Qiagen Rotor-Gene Q real-time PCR machine. To quantify the relative  
443 amount of *MATa-inc* in each sample, *Slx4p* was used as a reference gene and was  
444 amplified using primers NS047-*Slx4p*7 and *Slx4p*1. Primer sequences are shown in  
445 Table S2.

446

### 447 **References:**

- 448 1. Lee JY, Terakawa T, Qi Z, Steinfeld JB, Redding S, Kwon Y, et al. DNA  
449 RECOMBINATION. Base triplet stepping by the Rad51/RecA family of recombinases.  
450 Science. 2015;349(6251):977-81.
- 451 2. Bell JC, Kowalczykowski SC. RecA: Regulation and Mechanism of a Molecular  
452 Search Engine. Trends in biochemical sciences. 2016;41(6):491-507.
- 453 3. San Filippo J, Sung P, Klein H. Mechanism of eukaryotic homologous  
454 recombination. Annual review of biochemistry. 2008;77:229-57.
- 455 4. Haber JE. A Life Investigating Pathways That Repair Broken Chromosomes.  
456 Annual review of genetics. 2016;50:1-28.

- 457 5. Alani E, Thresher R, Griffith JD, Kolodner RD. Characterization of DNA-  
458 binding and strand-exchange stimulation properties of  $\gamma$ -RPA, a yeast single-strand-  
459 DNA-binding protein. *Journal of molecular biology*. 1992;227(1):54-71.
- 460 6. Raderschall E, Golub EI, Haaf T. Nuclear foci of mammalian recombination  
461 proteins are located at single-stranded DNA regions formed after DNA damage. *Proc*  
462 *Natl Acad Sci U S A*. 1999;96(5):1921-6.
- 463 7. Sung P. Yeast Rad55 and Rad57 proteins form a heterodimer that functions  
464 with replication protein A to promote DNA strand exchange by Rad51 recombinase.  
465 *Genes Dev*. 1997;11(9):1111-21.
- 466 8. Liu J, Renault L, Veaute X, Fabre F, Stahlberg H, Heyer WD. Rad51 paralogues  
467 Rad55-Rad57 balance the antirecombinase Srs2 in Rad51 filament formation.  
468 *Nature*. 2011;479(7372):245-8.
- 469 9. Sugiyama T, Kowalczykowski SC. Rad52 protein associates with replication  
470 protein A (RPA)-single-stranded DNA to accelerate Rad51-mediated displacement of  
471 RPA and presynaptic complex formation. *J Biol Chem*. 2002;277(35):31663-72.
- 472 10. Duan Z, Andronescu M, Schutz K, McIlwain S, Kim YJ, Lee C, et al. A three-  
473 dimensional model of the yeast genome. *Nature*. 2010;465(7296):363-7.
- 474 11. Lee CS, Wang RW, Chang HH, Capurso D, Segal MR, Haber JE. Chromosome  
475 position determines the success of double-strand break repair. *Proc Natl Acad Sci U*  
476 *S A*. 2016;113(2):E146-54.
- 477 12. Oza P, Jaspersen SL, Miele A, Dekker J, Peterson CL. Mechanisms that regulate  
478 localization of a DNA double-strand break to the nuclear periphery. *Genes Dev*.  
479 2009;23(8):912-27.
- 480 13. Horigome C, Oma Y, Konishi T, Schmid R, Marcomini I, Hauer MH, et al. SWR1  
481 and INO80 chromatin remodelers contribute to DNA double-strand break  
482 perinuclear anchorage site choice. *Molecular cell*. 2014;55(4):626-39.
- 483 14. Lao JP, Oh SD, Shinohara M, Shinohara A, Hunter N. Rad52 promotes  
484 postinvasion steps of meiotic double-strand-break repair. *Molecular cell*.  
485 2008;29(4):517-24.
- 486 15. Lisby M, Mortensen UH, Rothstein R. Colocalization of multiple DNA double-  
487 strand breaks at a single Rad52 repair centre. *Nature cell biology*. 2003;5(6):572-7.



- 488 16. Miyazaki T, Bressan DA, Shinohara M, Haber JE, Shinohara A. In vivo  
489 assembly and disassembly of Rad51 and Rad52 complexes during double-strand  
490 break repair. *The EMBO journal*. 2004;23(4):939-49.
- 491 17. Da Ines O, Degroote F, Goubely C, Amiard S, Gallego ME, White CI. Meiotic  
492 recombination in Arabidopsis is catalysed by DMC1, with RAD51 playing a  
493 supporting role. *PLoS Genet*. 2013;9(9):e1003787.
- 494 18. Cloud V, Chan YL, Grubb J, Budke B, Bishop DK. Rad51 is an accessory factor  
495 for Dmc1-mediated joint molecule formation during meiosis. *Science*.  
496 2012;337(6099):1222-5.
- 497 19. Tsabar M, Mason JM, Chan YL, Bishop DK, Haber JE. Caffeine inhibits gene  
498 conversion by displacing Rad51 from ssDNA. *Nucleic acids research*.  
499 2015;43(14):6902-18.
- 500 20. Kobayashi W, Sekine S, Machida S, Kurumizaka H. Green fluorescent protein  
501 fused to the C terminus of RAD51 specifically interferes with secondary DNA  
502 binding by the RAD51-ssDNA complex. *Genes Genet Syst*. 2014;89(4):169-79.
- 503 21. Akamatsu Y, Tsutsui Y, Morishita T, Siddique MS, Kurokawa Y, Ikeguchi M, et  
504 al. Fission yeast Swi5/Sfr1 and Rhp55/Rhp57 differentially regulate Rhp51-  
505 dependent recombination outcomes. *The EMBO journal*. 2007;26(5):1352-62.
- 506 22. Zou L, Elledge SJ. Sensing DNA damage through ATRIP recognition of RPA-  
507 ssDNA complexes. *Science*. 2003;300(5625):1542-8.
- 508 23. Dubrana K, van Attikum H, Hediger F, Gasser SM. The processing of double-  
509 strand breaks and binding of single-strand-binding proteins RPA and Rad51  
510 modulate the formation of ATR-kinase foci in yeast. *Journal of cell science*.  
511 2007;120(Pt 23):4209-20.
- 512 24. Dotiwala F, Eapen VV, Harrison JC, Arbel-Eden A, Ranade V, Yoshida S, et al.  
513 DNA damage checkpoint triggers autophagy to regulate the initiation of anaphase.  
514 *Proc Natl Acad Sci U S A*. 2013;110(1):E41-9.
- 515 25. Lee SE, Moore JK, Holmes A, Umezumi K, Kolodner RD, Haber JE. *Saccharomyces*  
516 Ku70, mre11/rad50 and RPA proteins regulate adaptation to G2/M arrest after DNA  
517 damage. *Cell*. 1998;94(3):399-409.

- 518 26. Shinohara A, Ogawa H, Ogawa T. Rad51 protein involved in repair and  
519 recombination in *S. cerevisiae* is a RecA-like protein. *Cell*. 1992;69(3):457-70.
- 520 27. Basile G, Aker M, Mortimer RK. Nucleotide sequence and transcriptional  
521 regulation of the yeast recombinational repair gene RAD51. *Molecular and cellular*  
522 *biology*. 1992;12(7):3235-46.
- 523 28. Sugawara N, Wang X, Haber JE. In vivo roles of Rad52, Rad54, and Rad55  
524 proteins in Rad51-mediated recombination. *Molecular cell*. 2003;12(1):209-19.
- 525 29. Sandell LL, Zakian VA. Loss of a yeast telomere: arrest, recovery, and  
526 chromosome loss. *Cell*. 1993;75(4):729-39.
- 527 30. Toczyski DP, Galgoczy DJ, Hartwell LH. CDC5 and CKII control adaptation to  
528 the yeast DNA damage checkpoint. *Cell*. 1997;90(6):1097-106.
- 529 31. Lee SE, Pelliccioli A, Vaze MB, Sugawara N, Malkova A, Foiani M, et al. Yeast  
530 Rad52 and Rad51 recombination proteins define a second pathway of DNA damage  
531 assessment in response to a single double-strand break. *Molecular and cellular*  
532 *biology*. 2003;23(23):8913-23.
- 533 32. Kim JA, Haber JE. Chromatin assembly factors Asf1 and CAF-1 have  
534 overlapping roles in deactivating the DNA damage checkpoint when DNA repair is  
535 complete. *Proc Natl Acad Sci U S A*. 2009;106(4):1151-6.
- 536 33. Aboussekhra A, Chanet R, Adjiri A, Fabre F. Semidominant suppressors of  
537 Srs2 helicase mutations of *Saccharomyces cerevisiae* map in the RAD51 gene, whose  
538 sequence predicts a protein with similarities to procaryotic RecA proteins.  
539 *Molecular and cellular biology*. 1992;12(7):3224-34.
- 540 34. Forget AL, Loftus MS, McGrew DA, Bennett BT, Knight KL. The human Rad51  
541 K133A mutant is functional for DNA double-strand break repair in human cells.  
542 *Biochemistry*. 2007;46(11):3566-75.
- 543 35. Wilson TE, Grawunder U, Lieber MR. Yeast DNA ligase IV mediates non-  
544 homologous DNA end joining. *Nature*. 1997;388(6641):495-8.
- 545 36. Teo SH, Jackson SP. Identification of *Saccharomyces cerevisiae* DNA ligase IV:  
546 involvement in DNA double-strand break repair. *The EMBO journal*.  
547 1997;16(15):4788-95.

- 548 37. Schar P, Herrmann G, Daly G, Lindahl T. A newly identified DNA ligase of  
549 *Saccharomyces cerevisiae* involved in RAD52-independent repair of DNA double-  
550 strand breaks. *Genes Dev.* 1997;11(15):1912-24.
- 551 38. Llorente B, Symington LS. The Mre11 nuclease is not required for 5' to 3'  
552 resection at multiple HO-induced double-strand breaks. *Molecular and cellular*  
553 *biology.* 2004;24(21):9682-94.
- 554 39. Wolner B, van Komen S, Sung P, Peterson CL. Recruitment of the  
555 recombinational repair machinery to a DNA double-strand break in yeast. *Molecular*  
556 *cell.* 2003;12(1):221-32.
- 557 40. Rouse J, Jackson SP. Interfaces between the detection, signaling, and repair of  
558 DNA damage. *Science.* 2002;297(5581):547-51.
- 559 41. Ball HL, Ehrhardt MR, Mordes DA, Glick GG, Chazin WJ, Cortez D. Function of  
560 a conserved checkpoint recruitment domain in ATRIP proteins. *Molecular and*  
561 *cellular biology.* 2007;27(9):3367-77.
- 562 42. Melo JA, Cohen J, Toczyski DP. Two checkpoint complexes are independently  
563 recruited to sites of DNA damage in vivo. *Genes Dev.* 2001;15(21):2809-21.
- 564 43. Nakada S, Katsuki Y, Imoto I, Yokoyama T, Nagasawa M, Inazawa J, et al. Early  
565 G2/M checkpoint failure as a molecular mechanism underlying etoposide-induced  
566 chromosomal aberrations. *The Journal of clinical investigation.* 2006;116(1):80-9.
- 567 44. Smith MJ, Rothstein R. Poetry in motion: Increased chromosomal mobility  
568 after DNA damage. *DNA repair.* 2017;56:102-8.
- 569 45. Fabre E, Zimmer C. From dynamic chromatin architecture to DNA damage  
570 repair and back. *Nucleus.* 2017:0.
- 571 46. Dion V, Gasser SM. Chromatin movement in the maintenance of genome  
572 stability. *Cell.* 2013;152(6):1355-64.
- 573 47. Strecker J, Gupta GD, Zhang W, Bashkurov M, Landry MC, Pelletier L, et al.  
574 DNA damage signalling targets the kinetochore to promote chromatin mobility.  
575 *Nature cell biology.* 2016;18(3):281-90.
- 576 48. Lawrimore J, Barry TM, Barry RM, York AC, Friedman B, Cook DM, et al.  
577 Microtubule dynamics drive enhanced chromatin motion and mobilize telomeres in  
578 response to DNA damage. *Molecular biology of the cell.* 2017;28(12):1701-11.

- 579 49. Villoria MT, Ramos F, Duenas E, Faull P, Cutillas PR, Clemente-Blanco A.  
580 Stabilization of the metaphase spindle by Cdc14 is required for recombinational  
581 DNA repair. *The EMBO journal*. 2017;36(1):79-101.
- 582 50. Plate I, Hallwyl SC, Shi I, Krejci L, Muller C, Albertsen L, et al. Interaction with  
583 RPA is necessary for Rad52 repair center formation and for its mediator activity. *J*  
584 *Biol Chem*. 2008;283(43):29077-85.
- 585 51. Anand R, Beach A, Li K, Haber J. Rad51-mediated double-strand break repair  
586 and mismatch correction of divergent substrates. *Nature*. 2017;544(7650):377-80.
- 587 52. Graham TG, Walter JC, Loparo JJ. Two-Stage Synapsis of DNA Ends during  
588 Non-homologous End Joining. *Molecular cell*. 2016;61(6):850-8.
- 589 53. Lobachev K, Vitriol E, Stemple J, Resnick MA, Bloom K. Chromosome  
590 fragmentation after induction of a double-strand break is an active process  
591 prevented by the RMX repair complex. *Curr Biol*. 2004;14(23):2107-12.
- 592 54. Wach A, Brachat A, Pohlmann R, Philippsen P. New heterologous modules for  
593 classical or PCR-based gene disruptions in *Saccharomyces cerevisiae*. *Yeast*.  
594 1994;10(13):1793-808.
- 595 55. Gietz RD, Woods RA. Transformation of yeast by lithium acetate/single-  
596 stranded carrier DNA/polyethylene glycol method. *Methods in enzymology*.  
597 2002;350:87-96.
- 598 56. Longtine MS, McKenzie A, 3rd, Demarini DJ, Shah NG, Wach A, Brachat A, et  
599 al. Additional modules for versatile and economical PCR-based gene deletion and  
600 modification in *Saccharomyces cerevisiae*. *Yeast*. 1998;14(10):953-61.
- 601 57. Hanway D, Chin JK, Xia G, Oshiro G, Winzeler EA, Romesberg FE. Previously  
602 uncharacterized genes in the UV- and MMS-induced DNA damage response in yeast.  
603 *Proc Natl Acad Sci U S A*. 2002;99(16):10605-10.
- 604 58. Tsabar M, Eapen VV, Mason JM, Memisoglu G, Waterman DP, Long MJ, et al.  
605 Caffeine impairs resection during DNA break repair by reducing the levels of  
606 nucleases Sae2 and Dna2. *Nucleic acids research*. 2015;43(14):6889-901.
- 607 59. Sugawara N, Haber JE. Monitoring DNA recombination initiated by HO  
608 endonuclease. *Methods in molecular biology*. 2012;920:349-70.

609 60. Thomas BJ, Rothstein R. Elevated recombination rates in transcriptionally  
610 active DNA. *Cell*. 1989;56(4):619-30.

611

612 **Figure Captions:**

613 **Fig 1. Rad51-GFP forms a DSB-dependent focus a)** Representative images of  
614 strain DW58 expressing endogenous Rad51-GFP 6 h after HO induction.  
615 Magnification of white boxed nucleus shown to the right. Scale bar = 5  $\mu\text{m}$ . **b)**  
616 Representative images of strain DW88 (*rad52* $\Delta$ ) prepared as in (a). **c)**  
617 Representative images of strain DW94 (no HO cut site) prepared as in (a). **d)**  
618 Quantification of the number of cells displaying Rad51-GFP foci in strain DW58,  
619 DW88, and DW94 at the indicated time. **e)** Background-subtracted fluorescence  
620 intensities of nuclei in strains DW58 (WT), DW88 (*rad52* $\Delta$ ), and DW94 (WT, no HO  
621 cut site) 6 h after HO induction as described in (a). Box plots display the median  
622 (black bar), mean (+), 25<sup>th</sup> and 75<sup>th</sup> percentiles (box ranges), 5<sup>th</sup> and 95<sup>th</sup>  
623 percentiles (whiskers), and outliers (dots). **f)** Representative image from strain  
624 DW89 expressing endogenous Rad51-GFP and Rad52-RFP from its endogenous  
625 promoter on a low copy plasmid 3 h after HO induction prepared as in (a) **g)**  
626 Quantification of Rad51 ChIP signal at the indicated time after induction of HO.  
627 Error bars represent the SD of three biological replicates of >150 cells per  
628 experiment.

629

630 **Fig 2. Rad51-GFP is not dominant negative a)** Quantification of the percentage of  
631 cells that adapt after 24 h after HO induction in the indicated strain. **b)**  
632 Quantification of the percent of viable cells following HO induction and repair  
633 through ectopic gene conversion in the indicated derivative of YJK17. Student's t test  
634 \*\*\*\*  $p \leq 0.0001$ . **c)** Quantification of the percentage of cells displaying a focus in the  
635 indicated derivative of YJK17 at the indicated time. **d)** qPCR analysis of the timing of  
636 DSB repair by gene conversion in the indicated derivatives of YJK17. **e)** Spot  
637 dilution assay without and with 0.002% MMS. Error bars represent the SD of three  
638 biological replicates.

639

640 **Fig 3. Rad51-GFP is competent in meiosis a)** Percent sporulated cells as  
641 determined by light microscopy in the indicated strain. **b)** Quantification of spore  
642 viability after tetrad dissection of sporulated cells. Error bars are representative of  
643 three biological replicates.

644

645 **Fig 4. Rad51-GFP forms multiple foci in response to multiple DSBs a)**  
646 Representative images from strain DW106 expressing endogenous Rad51-GFP and  
647 Rad52-RFP from its endogenous promoter 3 h after HO induction. Images prepared  
648 as in Figure 1A **b)** Quantification of Rad51-GFP and Rad52-RFP foci in DW106 3 h  
649 after induction of HO **c)** Representative images from strain DW280 (6 HO cute sites)  
650 expressing endogenous Rad51-GFP 3 h after HO induction prepared as in (a) **d)**  
651 Quantification of foci per cell in DW280 as described in (c). Error bars represent the  
652 SD of three biological replicates of >150 cells per experiment.

653

654 **Fig 5. Analysis of Ddc2-GFP focus dynamics after 3 DSBs a)** Representative  
655 images of 1, 2, or 3 foci in strain VE290 expressing endogenous Ddc2-GFP 3 h after  
656 HO induction.  $n$  = total number of cells displaying the indicated number of foci from  
657 three biological replicates. Images prepared as in Figure 1A. **b)** Quantification of  
658 Ddc2-GFP foci in strain VE290 (WT) and DW546 (*rad52Δ*) 3 h after HO induction.  
659 Error bars represent the SD of three biological replicates totaling 856 (WT) and 592  
660 (*rad52Δ*) cells. **c)** Background-subtracted fluorescence intensities of individual foci  
661 in strains VE290 (WT) and DW546 (*rad52Δ*) 3 h after HO induction as described in  
662 B. Box plots prepared as in Figure 1E. **d)** Time lapse images of Ddc2-GFP in strain  
663 VE290 suffering 3 DSBs 3 h after HO induction. Time after first image displayed in  
664 seconds below.

665

666 **Fig 6. Microtubule dependent Ddc2 foci dynamics a)** Strain DW547 expressing  
667 Ddc2-GFP and Mps3-mCherry 3 h after HO induction. Images prepared as in Figure  
668 1A. **b)** Similar to (a) with the addition of 15  $\mu$ g/ml nocodazole after 2 h of HO  
669 induction. **c)** Quantification of Ddc2-GFP foci from cells in (b). Error bars represent

670 the SD of three biological replicates of >150 cells per experiment. Student's t test:

671 \*\*\*  $p \leq 0.001$ , \*\*  $p \leq 0.01$ .

672

673

**Table S1. Strains used in this study**

| Strain | Genotype                                                                                                                                                                           | Parent Strain | Reference  | Figures            |
|--------|------------------------------------------------------------------------------------------------------------------------------------------------------------------------------------|---------------|------------|--------------------|
| JKM179 | hoΔ hmlΔ::ADE1 MATα hmrΔ::ADE1 ade1-100 leu2-3,112 lys5 trp1::hisG ura3-52 ade3::GAL10::HO                                                                                         |               | (25)       | 2A                 |
| VE290  | hoΔ hmlΔ::ADE1 MATα hmrΔ::ADE1 ade1-100 leu2-3,112 lys5 trp1::hisG ura3-52 ade3::GAL10::HO Chr6: 97749 nt::HPH:HOcs Chr2: 252kb::HOcs-URA3 ddc2-GFP::TRP1                          | YCSL004       | This study | 5A, 5B, 5C         |
| DW52   | MATα hoΔ hmlΔ::ADE1 hmrΔ::ADE1 arg5,6Δ::HPH::MATα-inc ade1-100 leu2,3-112 lys5 trp::hisG ura3-52 ade3::GAL::HO rad51-GSGGS-GFP::TRP1                                               | YJK17         | This study | 2B                 |
| DW58   | hoΔ hmlΔ::ADE1 MATα hmrΔ::ADE1 ade1-100 leu2-3,112 lys5 trp1::hisG ura3-52 ade3::GAL10::HO rad51-GSGGS-GFP::TRP1                                                                   | JKM179        | This study | 1A, 1B, 1D, 1G, 2A |
| DW65   | hoΔ hmlΔ::ADE1 MATα hmrΔ::ADE1 ade1-100 leu2-3,112 lys5 trp1::hisG ura3-52 ade3::GAL10::HO rad51::HPH                                                                              | JKM179        | This study | 2A                 |
| DW88   | hoΔ hmlΔ::ADE1 MATα hmrΔ::ADE1 ade1-100 leu2-3,112 lys5 trp1::hisG ura3-52 ade3::GAL10::HO rad51-GSGGS-GFP::TRP1 rad52::KAN                                                        | JKM179        | This study | 1B, 1D, 1E         |
| DW89   | hoΔ hmlΔ::ADE1 MATα hmrΔ::ADE1 ade1-100 leu2-3,112 lys5 trp1::hisG ura3-52 ade3::GAL10::HO rad51-GSGGS-GFP::TRP1 +pRad52-RFP (LEU2)                                                | JKM179        | This study | 1F                 |
| DW94   | hoΔ hmlΔ::ADE1 MATα hmrΔ::ADE1 ade1-100 leu2-3,112 lys5 trp1::hisG ura3-52 ade3::GAL10::HO rad51-GSGGS-GFP::TRP1 -HOcs                                                             | JKM179        | This study | 1C, 1D             |
| DW106  | hoΔ hmlΔ::ADE1 MATα hmrΔ::ADE1 ade1-100 leu2-3,112 lys5 trp1::hisG ura3-52 ade3::GAL10::HO Chr6: 97749 nt::HPH:HOcs Chr2: 252kb::HOcs-URA3 rad51-GSGGS-GFP::TRP1 +pRad52-RFP(LEU2) | YCSL004       | This study | 4A, 4B             |
| DW280  | Mata leu2-3,112 trp1-1 ura3-1 can1-100 ade2-1 his3-11,15 RAD5 6 Ty1-HOcs-HIS3 rad51-GSGGS-GFP::TRP1 +pGAL-HO(TRP1)                                                                 | LSY1228       | This study | 4C, 4D             |
| DW539  | MATα hoΔ hmlΔ::ADE1 hmrΔ::ADE1 arg5,6Δ::HPH::MATα-inc ade1-100 leu2,3-112 lys5 trp::hisG ura3-52 ade3::GAL::HO rad51-GSGGS-GFP::TRP1 +pRS315(LEU2)                                 | YJK17         | This study | 2B, 2C, 2D         |
| DW540  | MATα hoΔ hmlΔ::ADE1 hmrΔ::ADE1                                                                                                                                                     | YJK17         | This study | 2B, 2C, 2D         |

|         |                                                                                                                                                                            |         |            |            |
|---------|----------------------------------------------------------------------------------------------------------------------------------------------------------------------------|---------|------------|------------|
|         | <i>arg5,6Δ::HPH::MATα-inc ade1-100 leu2,3-112 lys5 trp::hisG ura3-52 ade3::GAL::HO rad51-GSGGS-GFP::TRP1 +pRad51(LEU2)</i>                                                 |         |            |            |
| DW546   | hoΔ hmlΔ::ADE1 MATα hmrΔ::ADE1 ade1-100 leu2-3,112 lys5 trp1::hisG ura3-52 ade3::GAL10::HO <i>ddc2-GFP::TRP1 rad52::KAN</i>                                                | YCSL004 | This study | 5B, 5C     |
| DW558   | hoΔ hmlΔ::ADE1 MATα hmrΔ::ADE1 ade1-100 leu2-3,112 lys5 trp1::hisG ura3-52 ade3::GAL10::HO <i>ddc2-GFP::TRP1 mps3-mCherry::KAN</i>                                         | YCSL004 | This study | 6A, 6B, 6C |
| W303-1A | MATα {leu2-3,112 trp1-1 can1-100 ura3-1 ade2-1 his3-11,15                                                                                                                  |         | (60)       | 3A, 3B     |
| W303-1B | MATα {leu2-3,112 trp1-1 can1-100 ura3-1 ade2-1 his3-11,15                                                                                                                  |         | (60)       | 3A, 3B     |
| DW504   | MATα {leu2-3,112 trp1-1 can1-100 ura3-1 ade2-1 his3-11,15 rad51-GSGGS-GFP::TRP1                                                                                            | W303    | This study | 3A, 3B     |
| DW505   | MATα {leu2-3,112 trp1-1 can1-100 ura3-1 ade2-1 his3-11,15 rad51-GSGGS-GFP::KAN                                                                                             | W303    | This study | 3A, 3B     |
| DW554   | MATα/a {leu2-3,112 trp1-1 can1-100 ura3-1 ade2-1 his3-11,15 rad51-GSGGS-GFP::KAN/rad51-GSGGS-GFP::TRP1                                                                     | W303    | This study | 3A, 3B     |
| DW123   | hoΔ hmlΔ::ADE1 MATα hmrΔ::ADE1 ade1-100 leu2-3,112 lys5 trp1::hisG ura3-52 ade3::GAL10::HO Chr6: 97749 nt::HPH:HOcs Chr2: 252kb::HOcs-URA3 rad51-GSGGS-GFP::TRP1 lig4::NAT | YCSL004 | This study | S2B        |

674

675

**Table S2. Primers used in this study**

| Primer Name        | Sequence                                                                                          | Use                                          |
|--------------------|---------------------------------------------------------------------------------------------------|----------------------------------------------|
| VE085 Ddc2-GFP For | ATCTAACCACACTAGAGGAGGCCGATTCATTATATATCTC<br>AATGGGACTGGGTGGTTCGGTGGTTCCTCCGGATCCCCGGGT<br>TAATTAA | C terminal GFP tagging of Ddc2 (forward)     |
| VE086 Ddc2-GFP Rev | ATTACAAGGTTTCTATAAAGCGTTGACATTTTCCCCTTTT<br>GATTGTTGCCGAATTCGAGCTCGTTTAAAC                        | C terminal GFP tagging of Ddc2 (reverse)     |
| DW060 Rad51-GFP 2F | CTATGAAGATGGTGTGGTGACCCAGAGAAGAAGACGA<br>GGGTGGTTCGGTGGTTCCTCCGGATCCCCGGGTAAATTAA                 | C terminal GFP tagging of Rad51 (forward)    |
| DW063 Rad51-GFP 1R | GAAAGTAAACCTGTGTAATAAATAGAGACAAGAGACCA<br>AATACGAATTCGAGCTCGTTTAAAC                               | C terminal GFP tagging of Rad51 (reverse)    |
| RAD51HPH1          | ATGTCCAAGTTCAAGAACAACATATATCAGAGTCACAGC<br>TTCAGTACGGGCATAGGCCACTAGTGGATCTG                       | Genomic deletion of RAD51 with HPH (forward) |
| RAD51HPH1          | CTACTCGTCTTCTTCTCTGGGGTCACCAACACCATCTTCA<br>TAGATCGGATTTTCAGCTGAAGCTTCGTACGC                      | Genomic deletion of RAD51 with HPH (reverse) |
| DW091 Rad52 1F     | GGAGGTTGCCAAGAAGCTGCTGAAGGTTCTGGTGGCTTTGG<br>TGTTGTTGATGCGTACGCTGCAGGTCGAC                        | Genomic deletion of RAD52 with KAN (forward) |
| DW092 Rad52 1R     | AGTAATAAATAATGATGCAAATTTTTATTTGTTTCGGCC<br>AGGAAGCGTTTCAATCGATGAATTCGAGCTCG                       | Genomic deletion of RAD52 with KAN (reverse) |



|                     |                                                                          |                                                   |
|---------------------|--------------------------------------------------------------------------|---------------------------------------------------|
| DW493<br>mps3GFP 1F | CATCCCGCTTCTAACGTCCCATCATTTGGCCAAGATGAGC<br>TAGATCAACGGATCCCGGGTTAATTA   | C terminally tag<br>mCherry tag Mps3<br>(forward) |
| DW494<br>mps3GFP 1R | CGATTTTCTGGGGGCCAGGGGGTTAGAACGTTTAATTTTT<br>TATTGTCGTGAATTCGAGCTCGTTAAAC | C terminally tag<br>mCherry tag Mps3<br>(reverse) |
| DW265 Rad51<br>3F   | CCGTAGTTTCCATATACTAGTAGTTGAG                                             | Confirm deletion /<br>GFP tagging (forward)       |
| DW266 Rad51<br>3R   | AGATAAAAATGTACGGAACGCAACC                                                | Confirm deletion /<br>GFP tagging (reverse)       |
| ddc2-400 FP         | CGTATTGTGTGGCACCGATGTTAAGCAC                                             | Confirm GFP tagging<br>(forward)                  |
| ddc2+400 RP         | CTCACACCTTGTGTAACAGATGTGGTCG                                             | Confirm GFP tagging<br>(reverse)                  |
| DW093 Rad52<br>2F   | CCTGTAATGTCCTTTCGTCTTC                                                   | Confirm deletion<br>(forward)                     |
| DW094 Rad52<br>2R   | CGACACATGGAGGAAAGAAA                                                     | Confirm deletion<br>(reverse)                     |
| MATp13              | GTAAAGATAAGAACAACAAGGATGCT                                               | Monitor repair by<br>qPCR Chr3 201210-<br>201183  |
| MATyp4              | GATCTAAATAAATTCGTTTTCAATGATTAATAATAG                                     | Monitor repair by<br>qPCR Chr3 294342-<br>294342  |
| CSL177-Yalpha<br>p1 | CTCACAGTTTGGCTCCGGTG                                                     | Chr3 200750-200769                                |
| NS047-Slx4p7        | ACCACTAAGTGACAAAGAACTACG                                                 | Chr12 413147-<br>413124 Crick R-L                 |
| Slx4p1              | GATATGGACCTCTGTCCTTCCT                                                   | Chr12 412956-<br>412977 Watson L->R               |

676

677 **Supplementary Figure Legends:**

678

679 **Figure S1: Rad51-GFP localization.** **a)** Representative full field image of strain  
680 DW58 expressing endogenous Rad51-GFP 6 h after HO induction. **b)** Representative  
681 full field image of strain DW88 (*rad52Δ*) expressing Rad51-GFP 6 h after HO  
682 induction. **c)** Representative images of strain DW94 (no HO cut site) expressing  
683 Rad51-GFP 6 h after HO induction. **d)** Representative full field image from strain  
684 DW89 expressing endogenous Rad51-GFP and Rad52-RFP from its endogenous  
685 promoter on a low copy plasmid 3 h after HO induction. Maximum projection of 12  
686 z-stack images every 0.4 μm. Scale bar = 5 μm

687

688 **Figure S2: Rad51-GFP localization in multi-break strains** **a)** Representative full  
689 field images of strain DW106 expressing Rad51-GFP and Rad52-RFP 3 h after HO  
690 induction. **b)** Quantification of Rad51-GFP foci in strain DW123 (*lig4Δ*) **c)**

691 Representative full field images of strain DW280 expressing Rad51-GFP 3 h after HO  
692 induction. Maximum projection of 12 z-stack images every 0.4  $\mu\text{m}$ . Scale bar = 5  $\mu\text{m}$

693

694 **Figure S3: Ddc2-GFP localization in multi-break strains\_a)** Representative full  
695 field image of strain VE290 expressing Ddc2-GFP 3 h after HO induction. **b)**

696 Representative full field image of strain DW546 (*rad52* $\Delta$ ) expressing Ddc2-GFP 3 h  
697 after HO induction. Maximum projection of 12 z-stack images every 0.4  $\mu\text{m}$ . Scale  
698 bar = 5  $\mu\text{m}$

699

700 **Movie S4 – S6** Ddc2-GFP in 3 DSB strain DW546 (*rad52* $\Delta$ ) 3 h after HO induction.

701 Scale bar = 5  $\mu\text{m}$ .

702

703 **Movie S7 – S17** Ddc2-GFP in 3 DSB strain VE290 3 h after HO induction. Scale bar =

704 5  $\mu\text{m}$ .

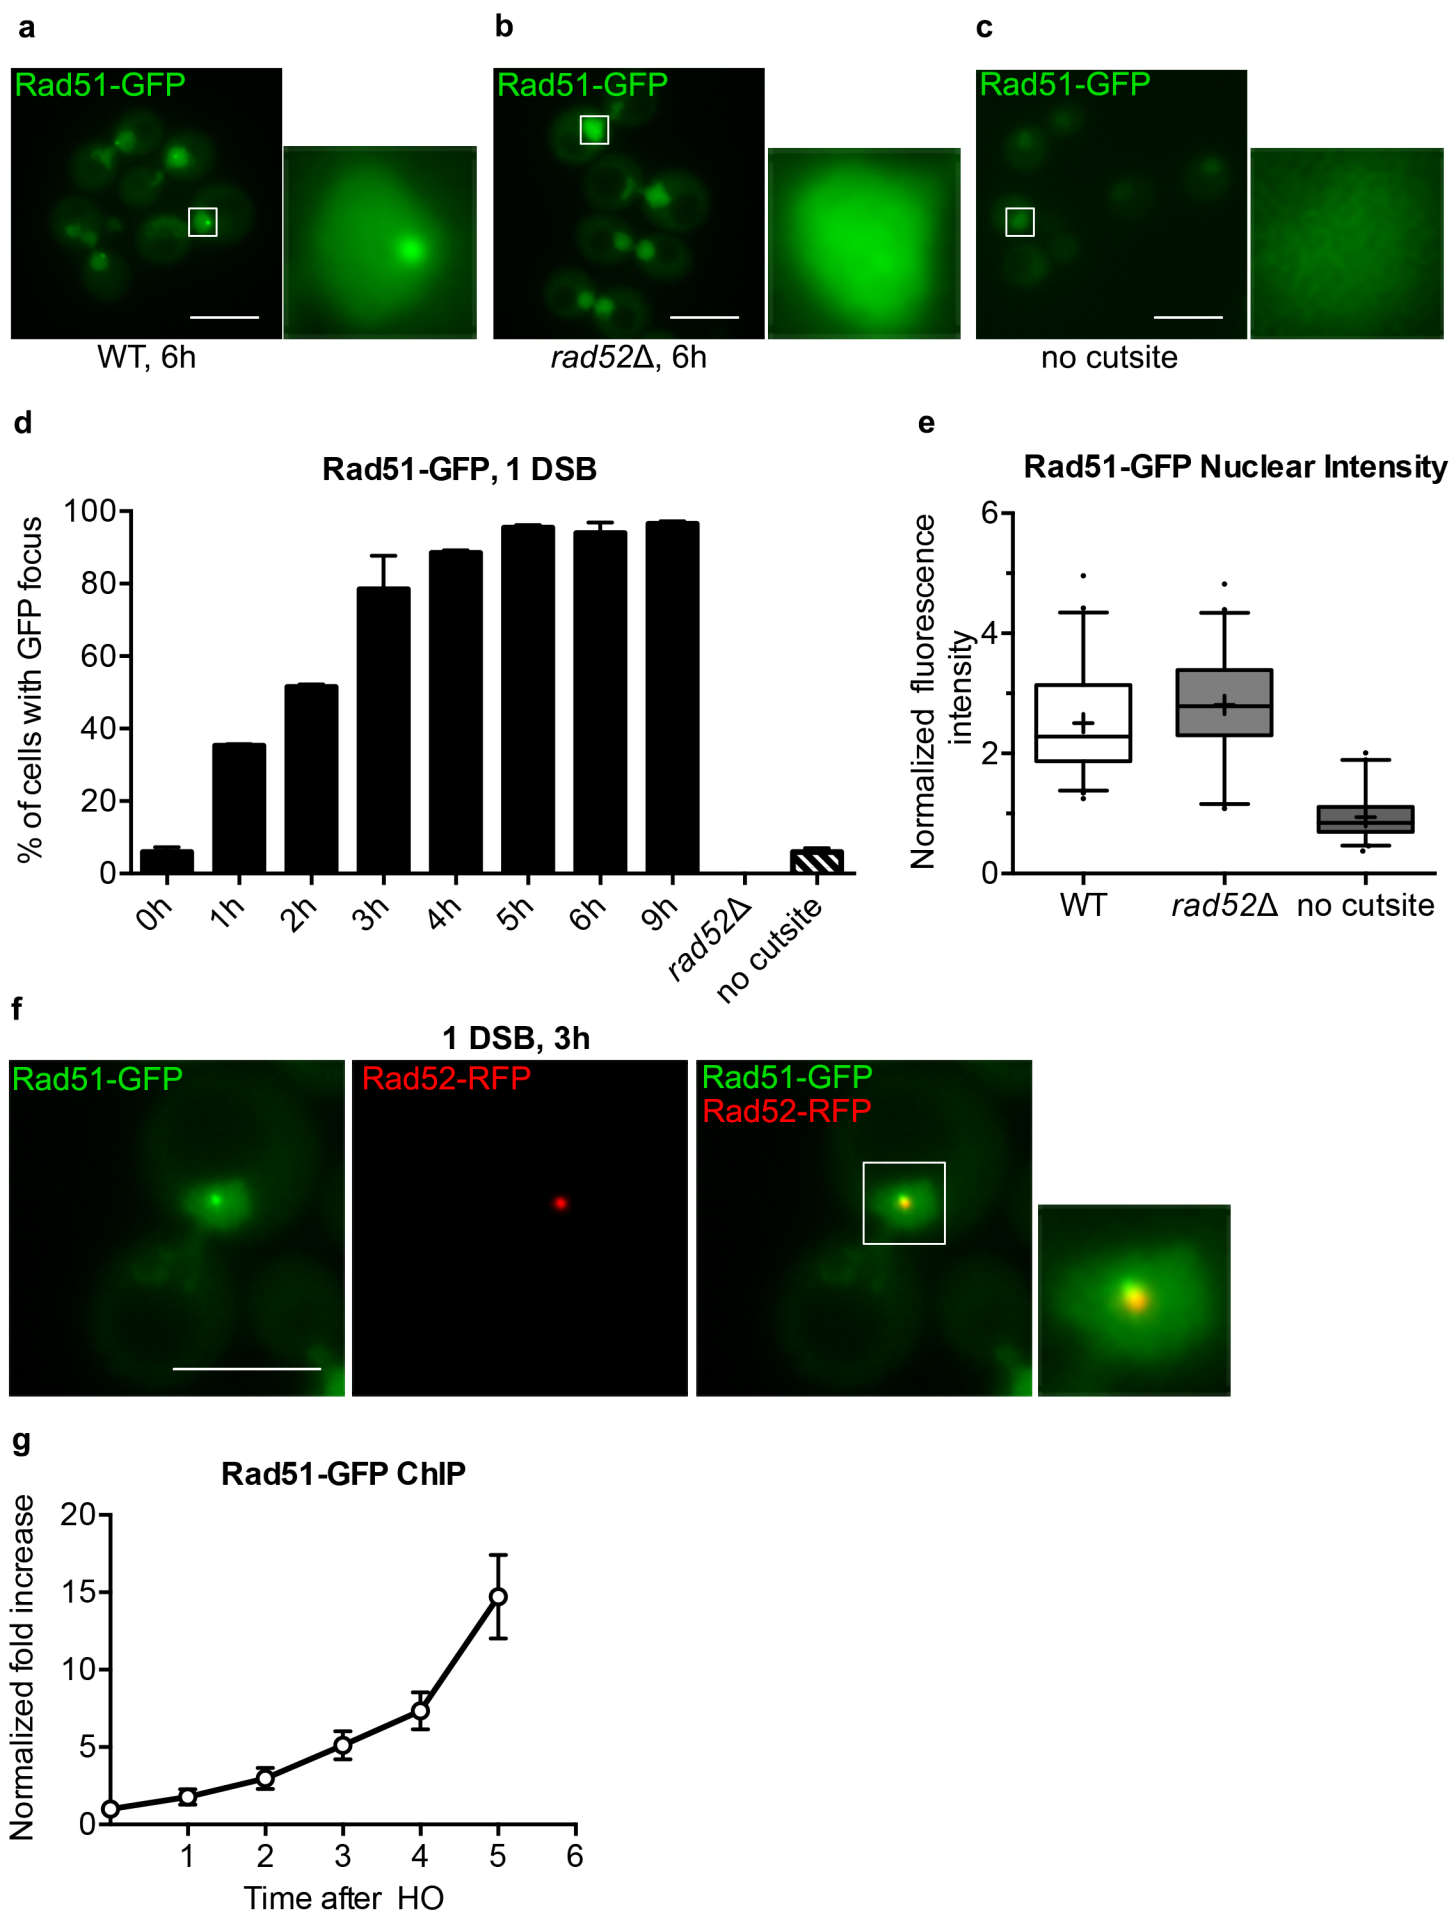

Figure 1

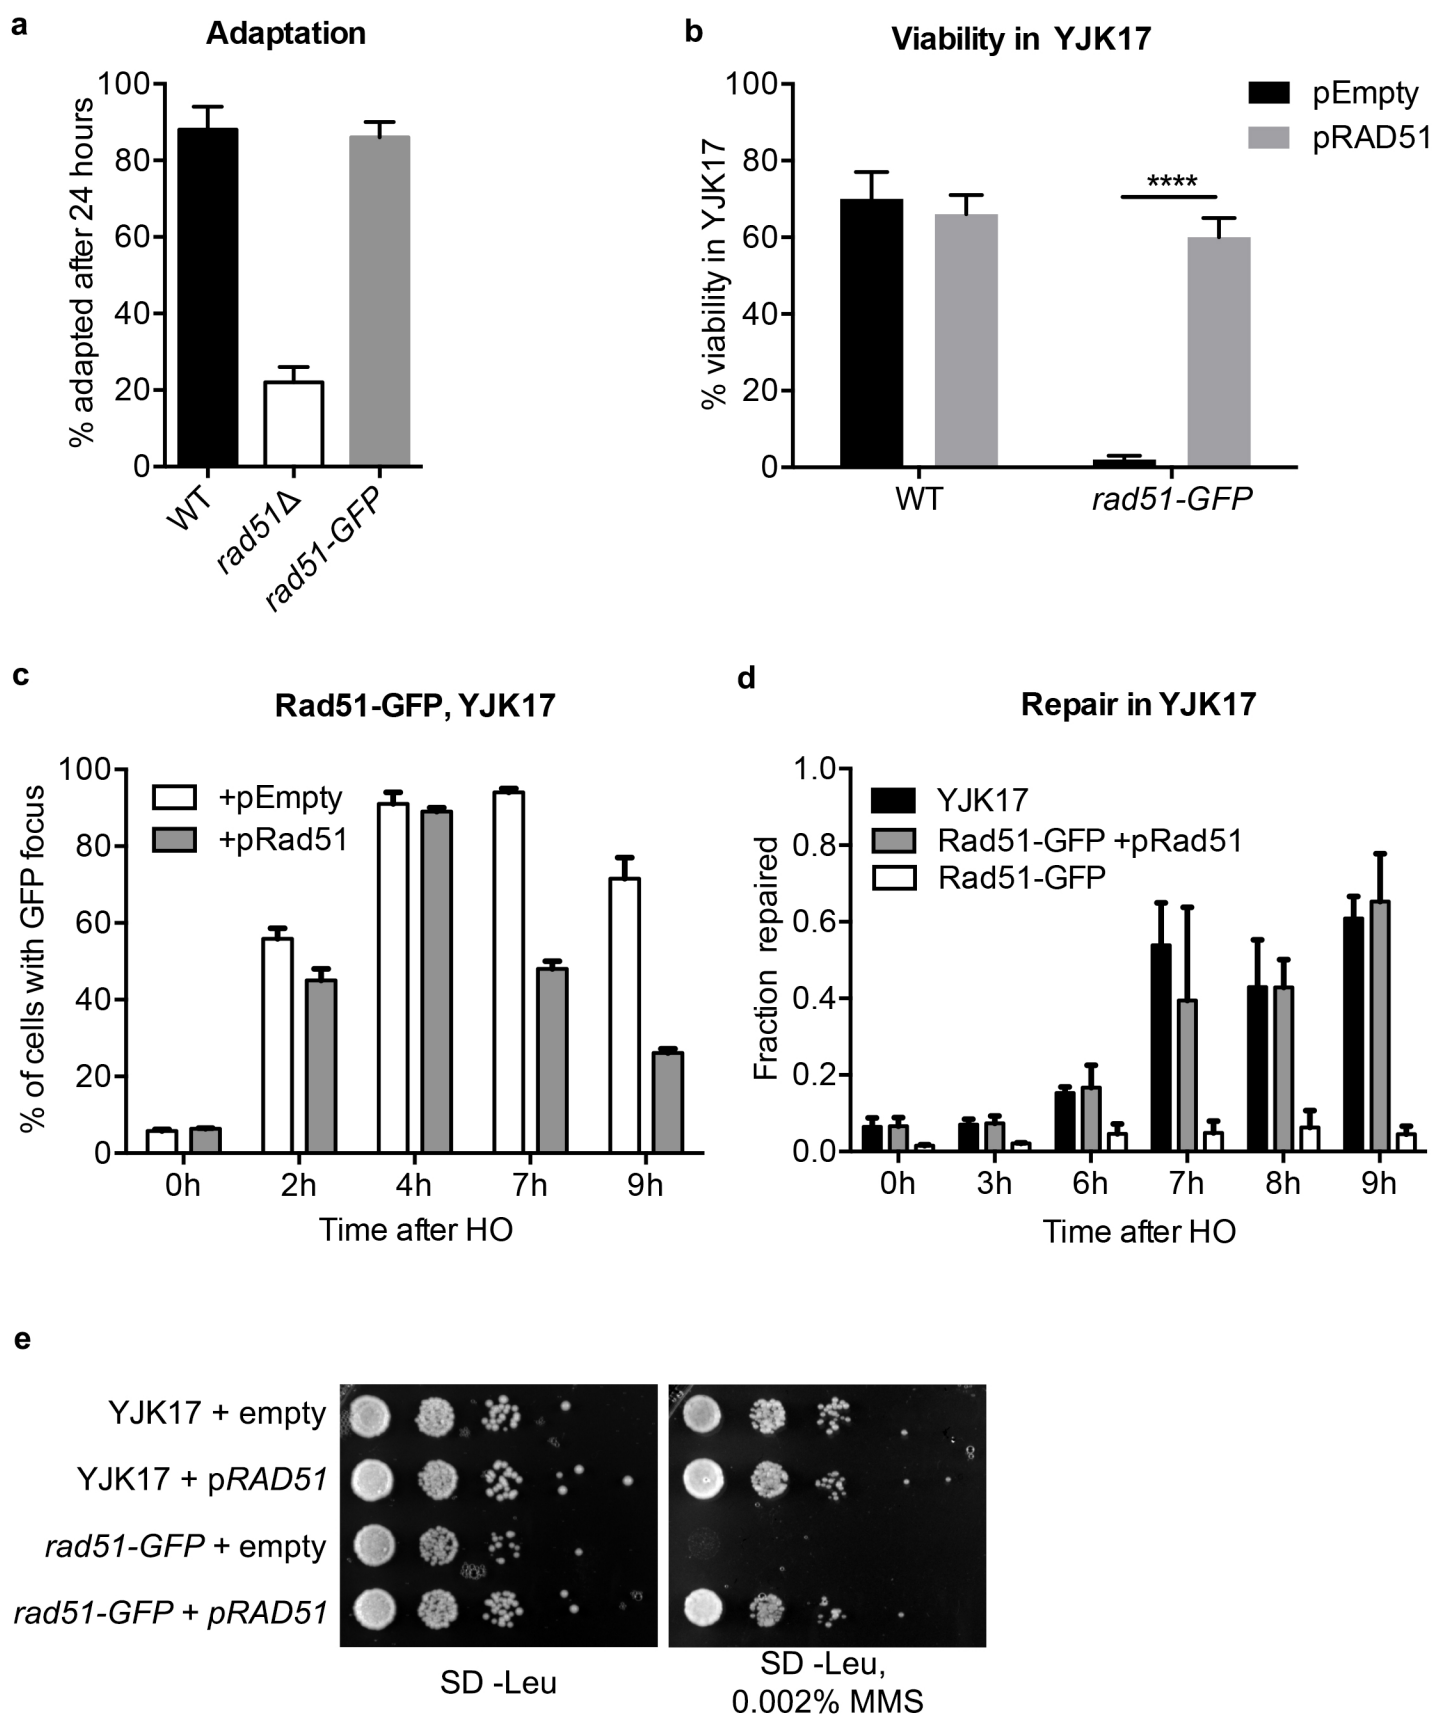

**Figure 2**

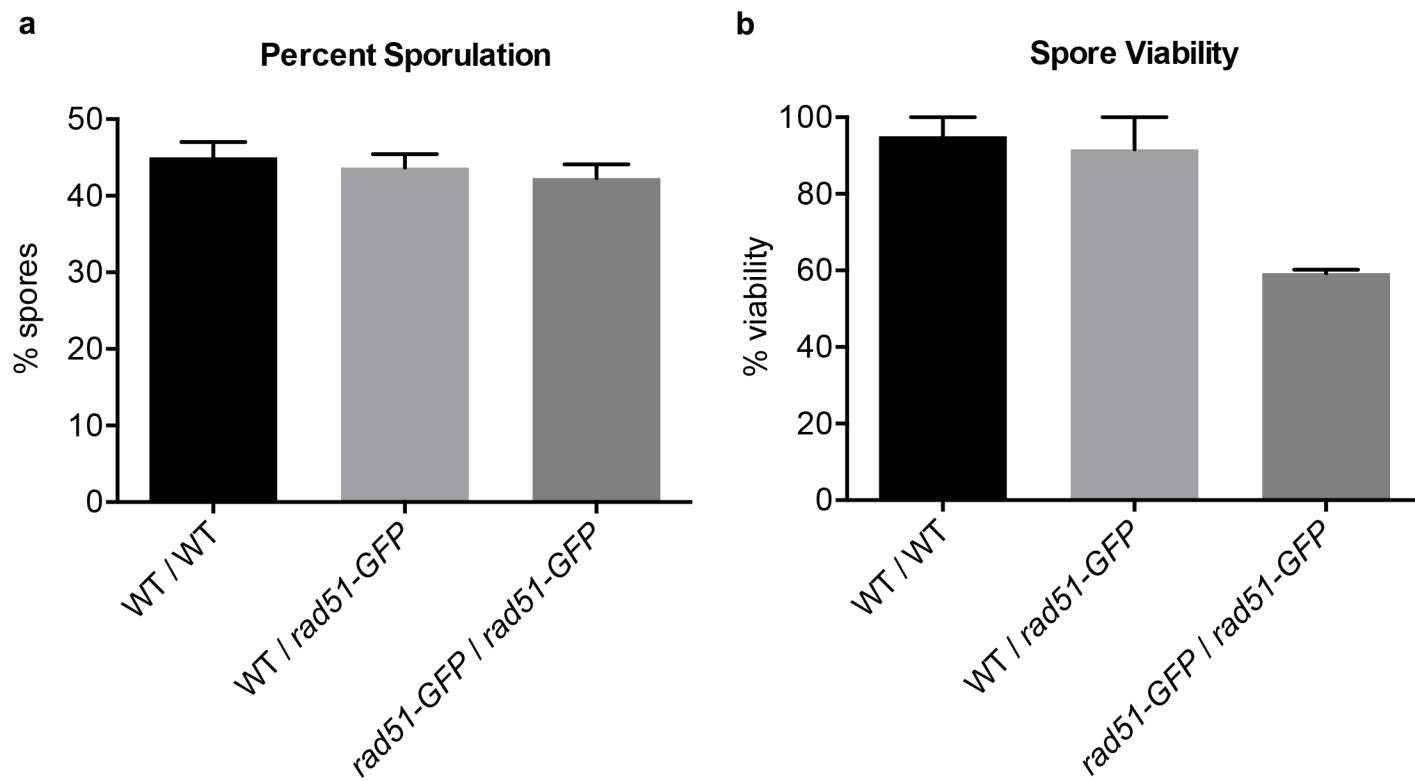

**Figure 3**

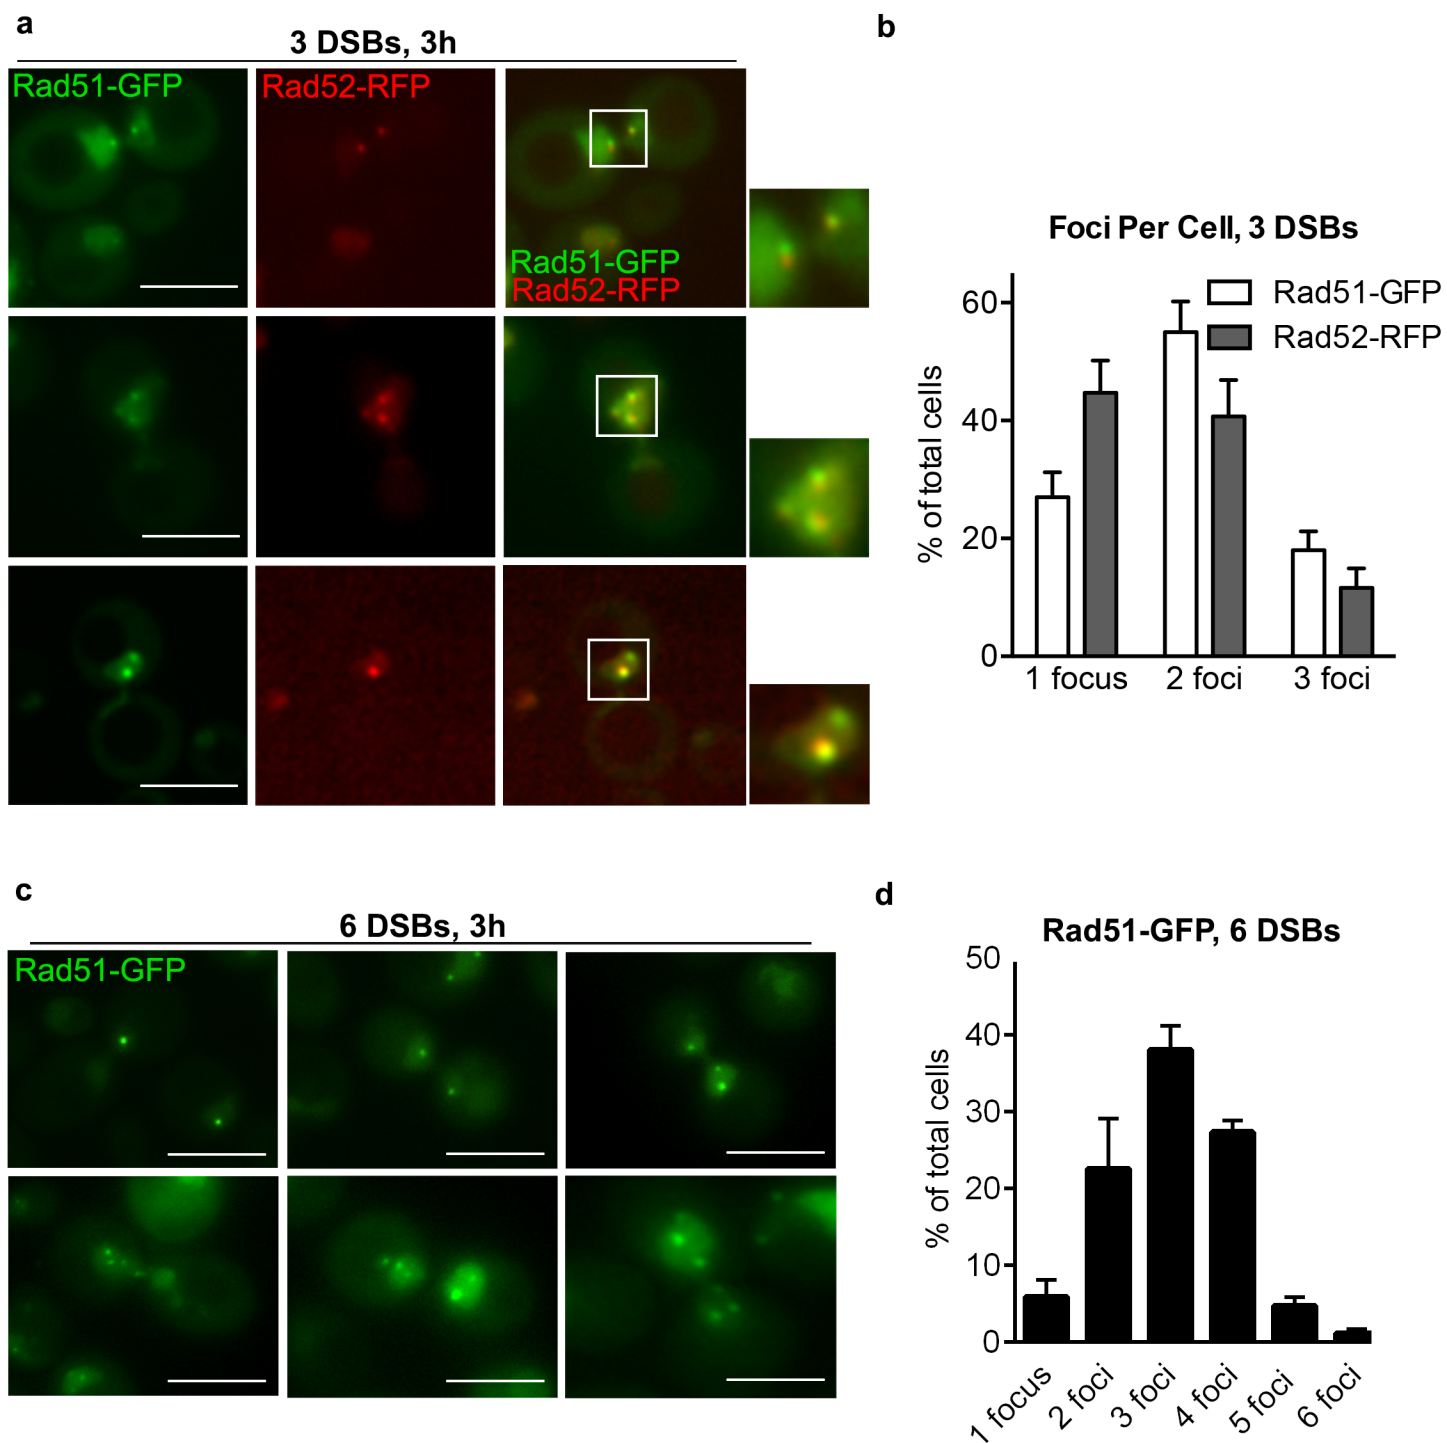

Figure 4

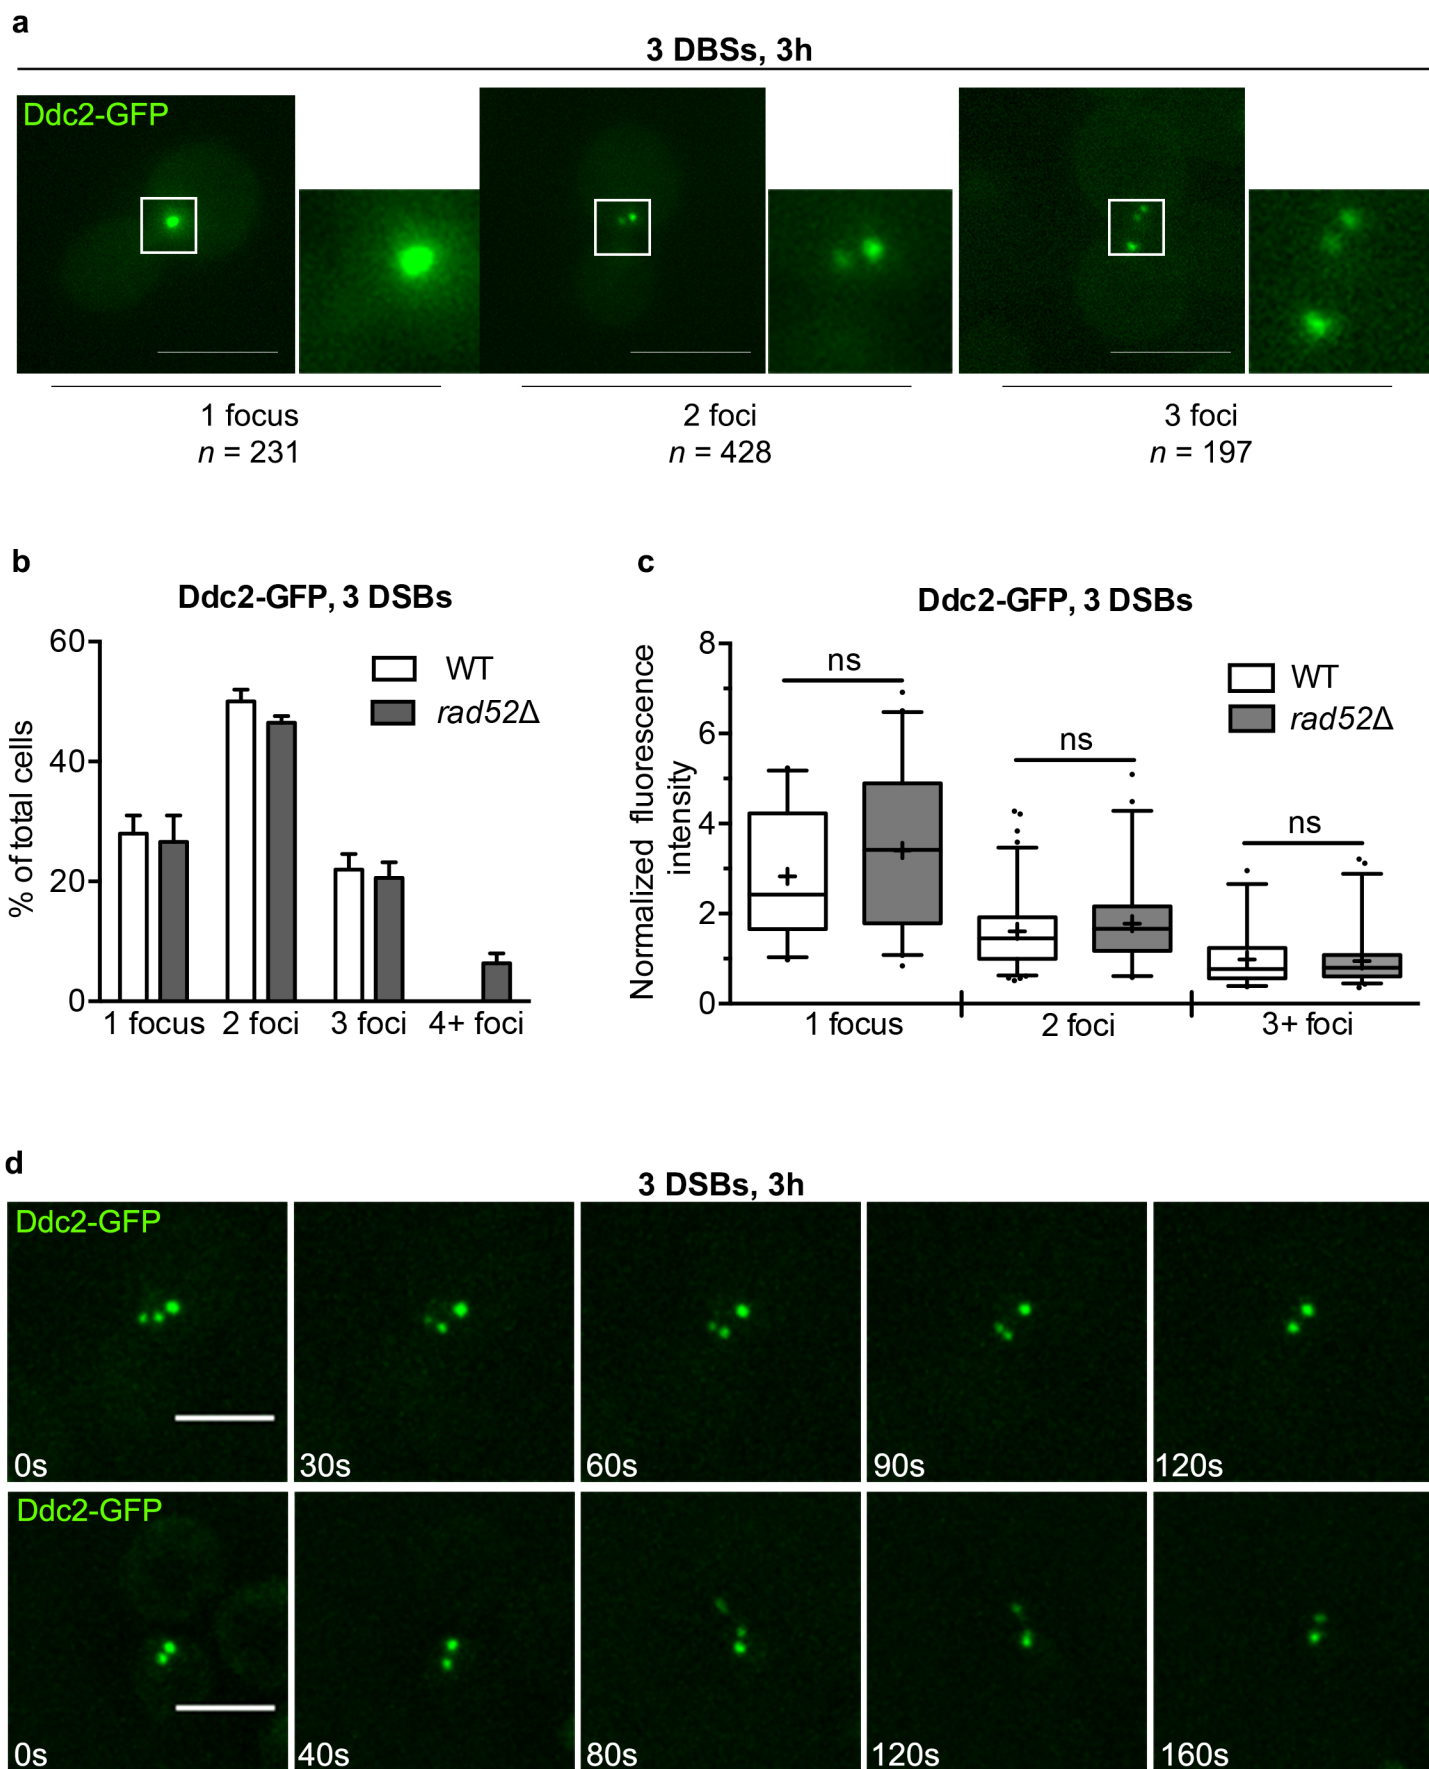

Figure 5

**a**

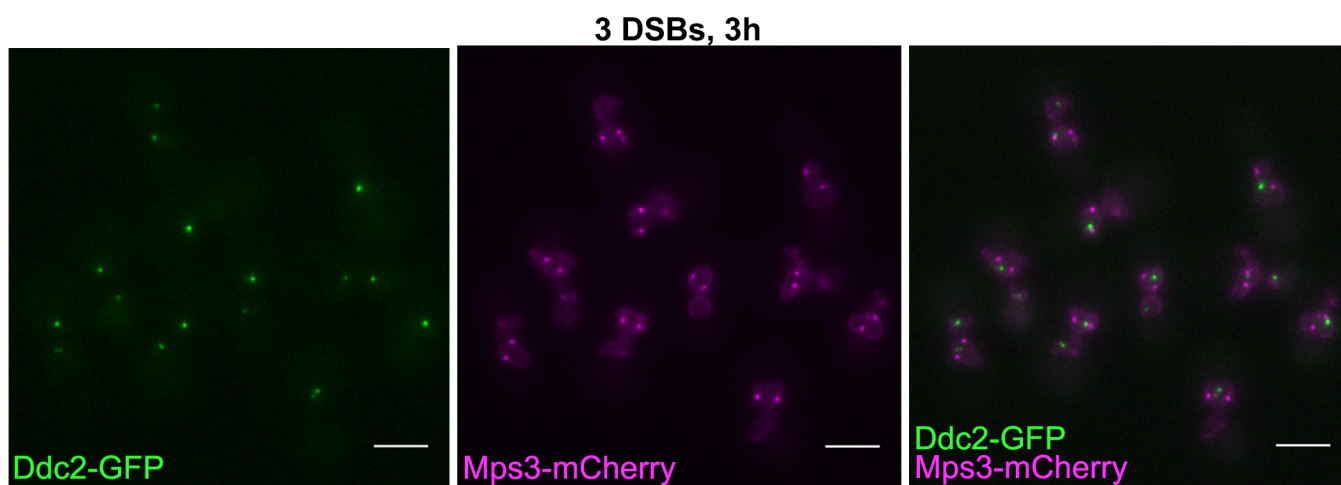

**b**

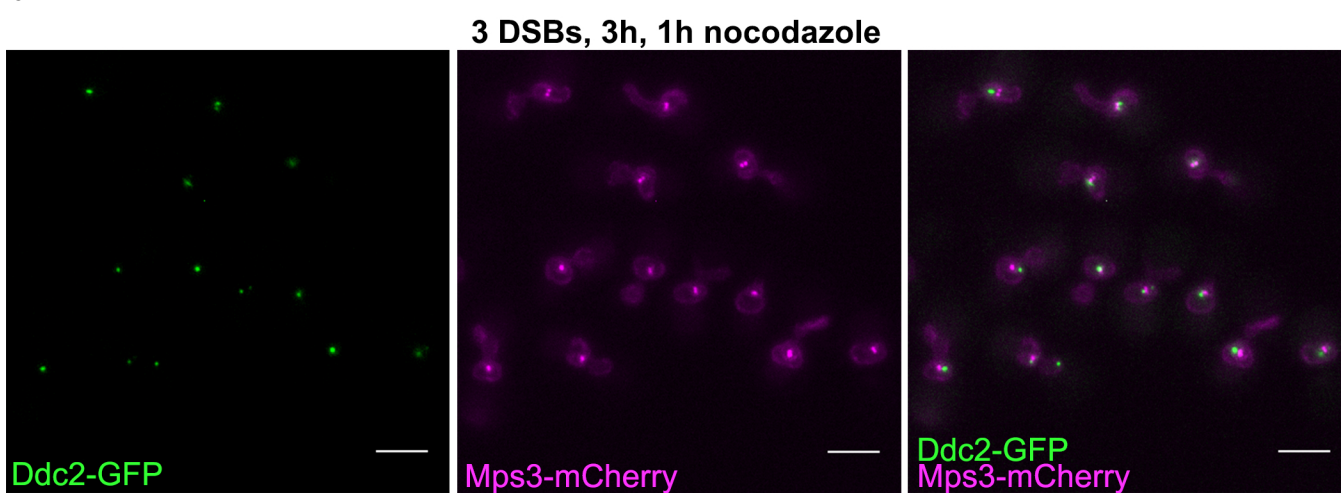

**c**

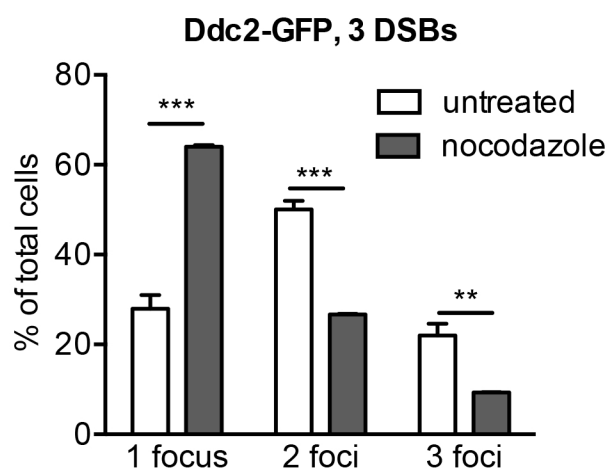

**Figure 6**
